# Supplementary material for: Uncoupling Transcription from Covalent Histone Modification
Source: PubMed Central journal article supplement (PMC3983032; doi:10.1371/journal.pgen.1004202), 2014-04-10

**A**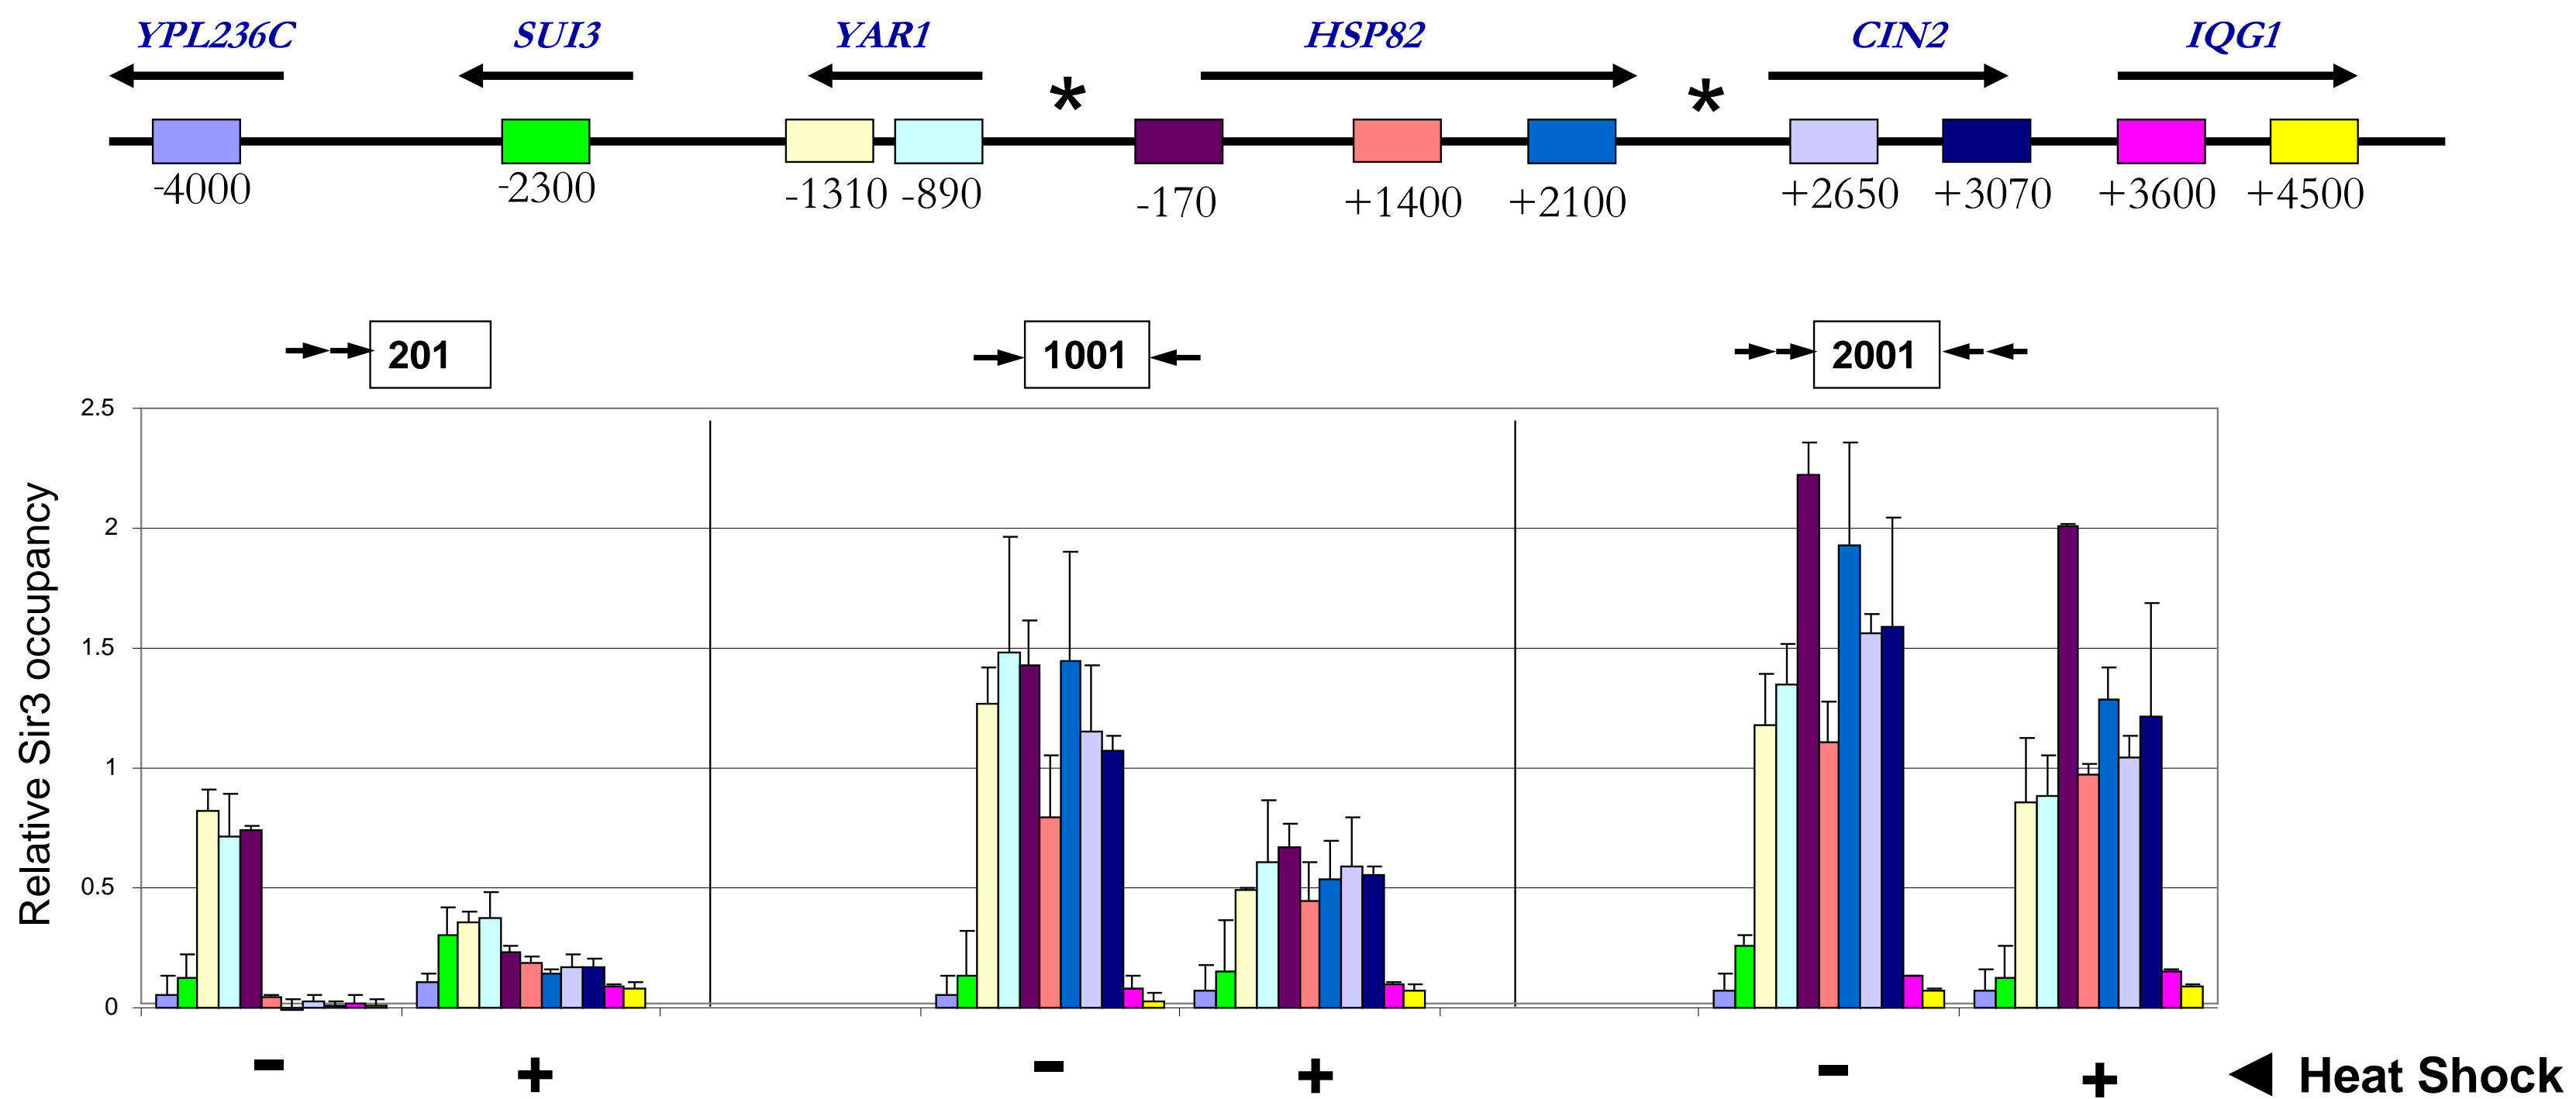**B**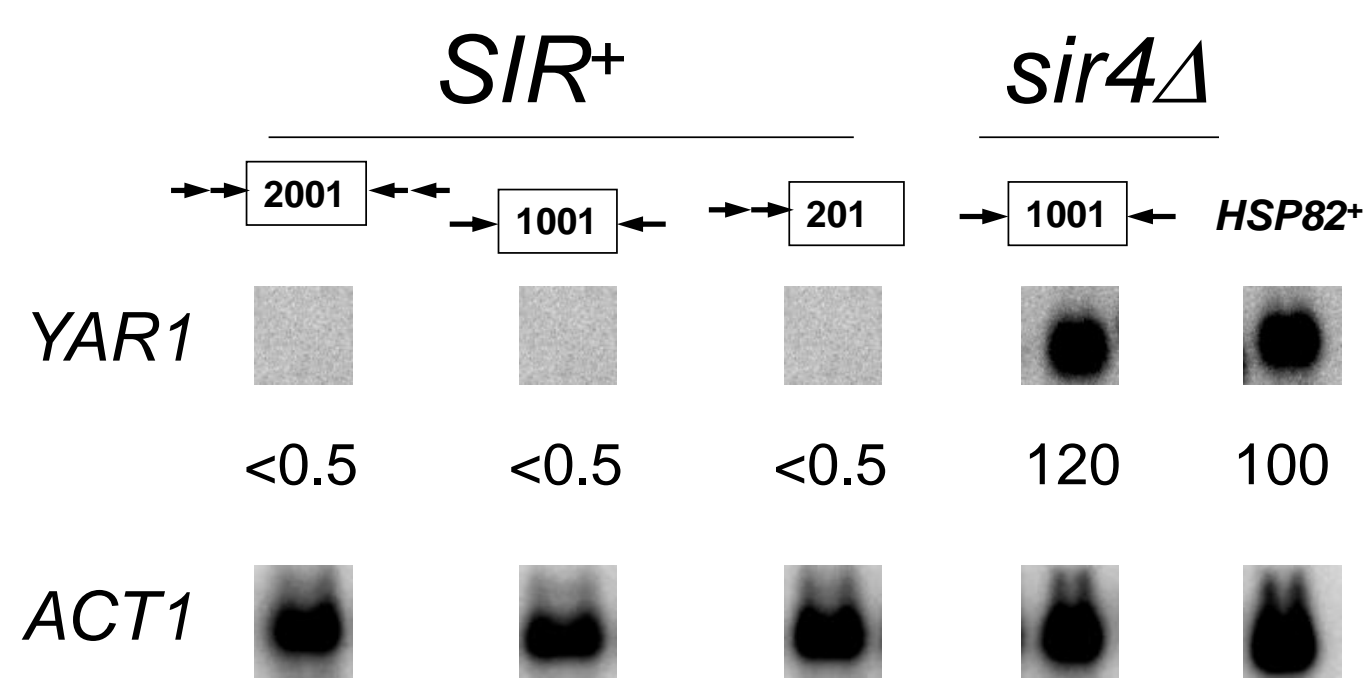**C**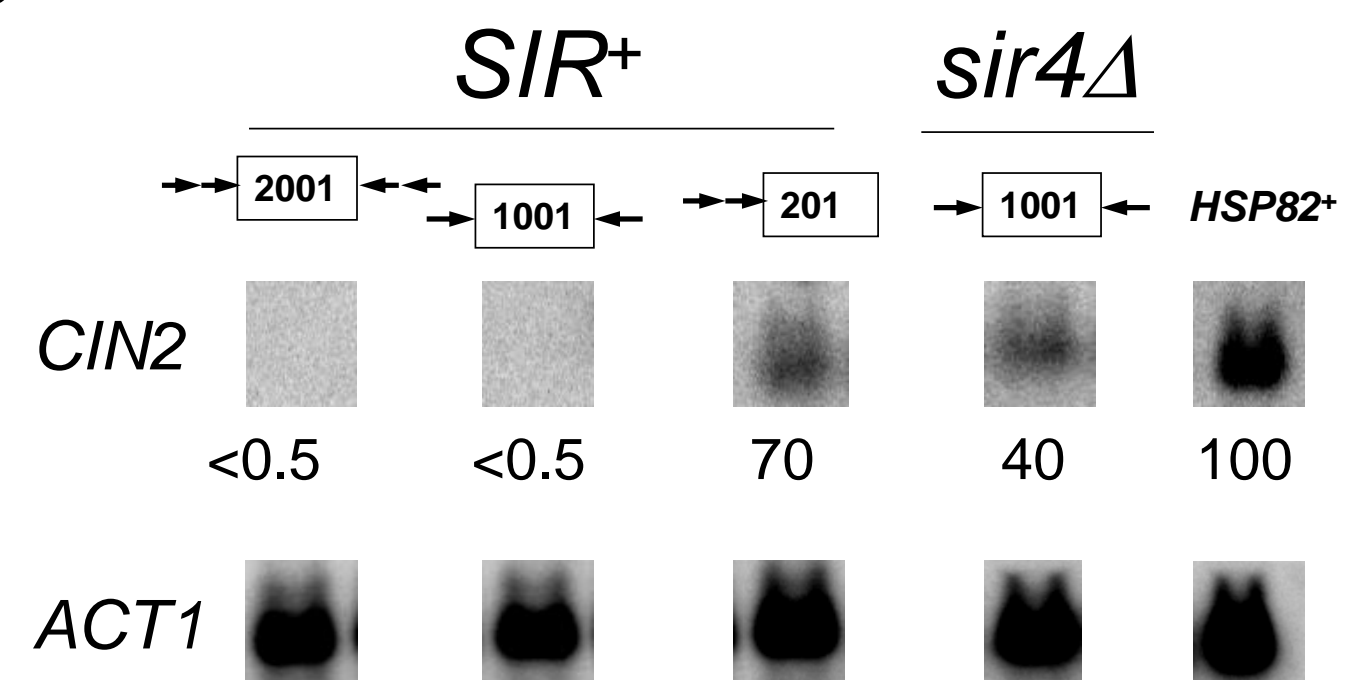**D**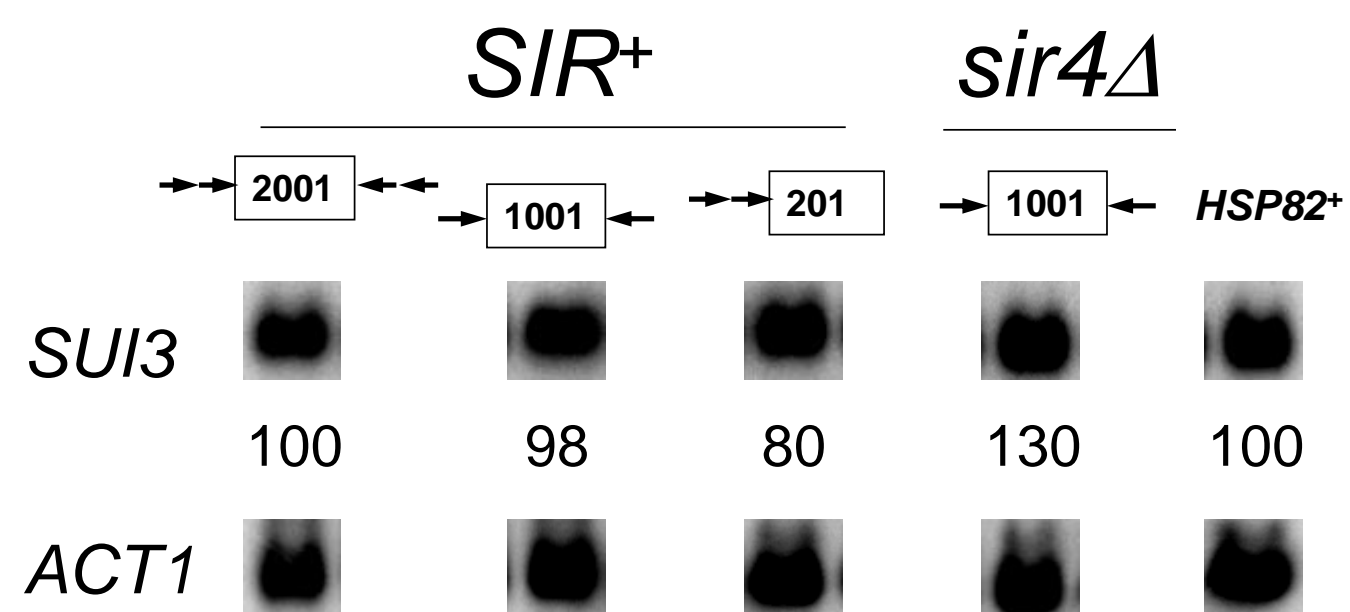**E**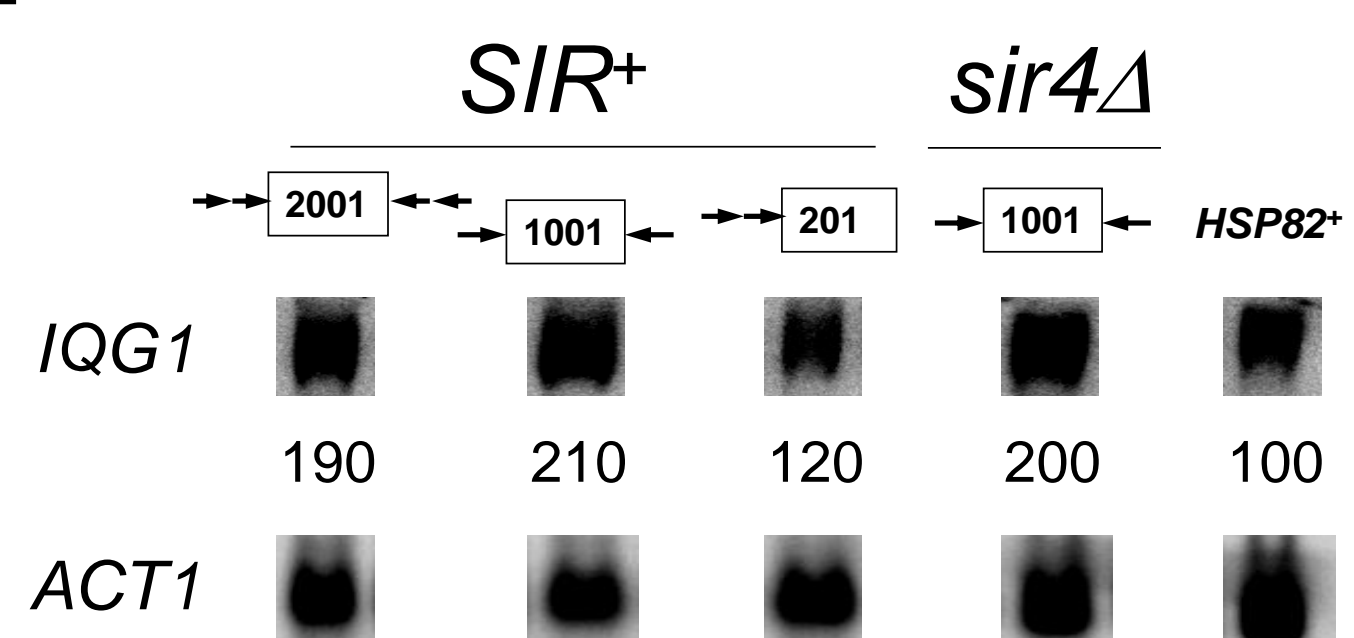

Supplement: pgen.1004202.s001.pdf [file pgen.1004202.s001.pdf]
